# Supplementary material for: Psychological frailty in older adults: a systematic scoping review
Source: bioRxiv or medRxiv preprint supplement (doi:10.1101/2022.08.01.22278302), 2022-08-03
Supplement: Supplementary file [file media-1.pdf]

## Supplementary Materials

### 1. The complete search strategy (5 databases)

The following search strategy was used for the literature search.

Years of publication covered: 2003-2022.

Limitations: humans, English language.

Search date: 11 March 2022.

CINAHL Complete (via EBSCO Host) Search:

|    |                                                                                                                                                                                                                                                                                                                                                                                                                                                                                                                                                                                                |         |
|----|------------------------------------------------------------------------------------------------------------------------------------------------------------------------------------------------------------------------------------------------------------------------------------------------------------------------------------------------------------------------------------------------------------------------------------------------------------------------------------------------------------------------------------------------------------------------------------------------|---------|
| #1 | Frailty* [TX] OR Frail* [TX] OR "Frailty Syndrome" [MH] OR Physical frailty [TX]                                                                                                                                                                                                                                                                                                                                                                                                                                                                                                               | 43,063  |
| #2 | Psychological frailty [TX]                                                                                                                                                                                                                                                                                                                                                                                                                                                                                                                                                                     | 256     |
| #3 | #1 AND #2                                                                                                                                                                                                                                                                                                                                                                                                                                                                                                                                                                                      | 256     |
| #4 | (elder* OR geriatric* OR "old age" OR "oldest old" OR "older old" OR "later life" OR ageing OR aging OR "old adults" OR "older adults" OR "oldest adults" OR "old population" OR "Older population" OR "oldest population" OR "old individuals" OR "older individuals" OR "oldest individuals" OR "old patients" OR "older patients" OR "oldest patients" OR "old persons" OR "older persons" OR "oldest persons" OR "old people" OR "older people" OR "oldest people" OR "aged adults" OR "aged population" OR "aged individuals" OR "aged patients" OR "aged persons" OR "aged people") [TX] | 670,818 |
| #5 | "Frail Elderly" [MH]                                                                                                                                                                                                                                                                                                                                                                                                                                                                                                                                                                           | 8,300   |
| #6 | #4 OR #5                                                                                                                                                                                                                                                                                                                                                                                                                                                                                                                                                                                       | 670,818 |
| #7 | #3 AND #6                                                                                                                                                                                                                                                                                                                                                                                                                                                                                                                                                                                      | 239     |
| #8 | Limit to "English" and "published year after 2003"                                                                                                                                                                                                                                                                                                                                                                                                                                                                                                                                             |         |
| #9 | #7 AND #8                                                                                                                                                                                                                                                                                                                                                                                                                                                                                                                                                                                      | 231     |

PubMed Search:

|    |                                                                                                                                                                                                                                                                                                                                                                                                                                                                                 |           |
|----|---------------------------------------------------------------------------------------------------------------------------------------------------------------------------------------------------------------------------------------------------------------------------------------------------------------------------------------------------------------------------------------------------------------------------------------------------------------------------------|-----------|
| #1 | "Frailty" [All Fields] OR "Frail" [All Fields] OR "Physical frailty" [All Fields]                                                                                                                                                                                                                                                                                                                                                                                               | 34,974    |
| #2 | "Psychological frailty" [All Fields]                                                                                                                                                                                                                                                                                                                                                                                                                                            | 982       |
| #3 | #1 AND #2                                                                                                                                                                                                                                                                                                                                                                                                                                                                       | 977       |
| #4 | (elder* OR geriatric* OR "old age" OR "oldest old" OR "older old" OR "later life" OR ageing OR aging OR "old adults" OR "older adults" OR "oldest adults" OR "old population" OR "Older population" OR "oldest population" OR "old individuals" OR "older individuals" OR "oldest individuals" OR "old patients" OR "older patients" OR "oldest patients" OR "old persons" OR "older persons" OR "oldest persons" OR "old people" OR "older people" OR "oldest people" OR "aged | 1,044,510 |

|    |                                                                                                           |           |
|----|-----------------------------------------------------------------------------------------------------------|-----------|
|    | adults" OR "aged population" OR "aged individuals" OR "aged patients" OR "aged persons" OR "aged people") |           |
| #5 | "Aged" [MeSH] OR "Frail Elderly" [MeSH]                                                                   | 3,380,462 |
| #6 | #4 OR #5                                                                                                  | 3,948,917 |
| #7 | #3 AND #6                                                                                                 | 880       |
| #8 | Limit to "English" and "published year after 2003"                                                        |           |
| #9 | #7 AND #8                                                                                                 | 798       |

Scopus Search:

(TITLE-ABS-KEY (frailty\*) AND TITLE-ABS-KEY (frail\*) AND TITLE-ABS-KEY (physical frailty) AND TITLE-ABS-KEY (psychological frailty)) AND (TITLE-ABS-KEY (elder\* OR geriatric\* OR "old age" OR "oldest old" OR "older old" OR "later life" OR ageing OR aging OR "old adults" OR "older adults" OR "oldest adults" OR "old population" OR "Older population" OR "oldest population" OR "old individuals" OR "older individuals" OR "oldest individuals" OR "old patients" OR "older patients" OR "oldest patients" OR "old persons" OR "older persons" OR "oldest persons" OR "old people" OR "older people" OR "oldest people" OR "aged adults" OR "aged population" OR "aged individuals" OR "aged patients" OR "aged persons" OR "aged people")) AND (SUBJAREA (nurs OR medi OR heal OR mult OR psyc OR soci)) AND (LANGUAGE (English)) AND (PUBYEAR AFT 2003)

=565 articles

Web of Science Search:

|    |                                                                                                                                                                                                                                                                                                                                                                                                                                                                                                                                                                                               |           |
|----|-----------------------------------------------------------------------------------------------------------------------------------------------------------------------------------------------------------------------------------------------------------------------------------------------------------------------------------------------------------------------------------------------------------------------------------------------------------------------------------------------------------------------------------------------------------------------------------------------|-----------|
| #1 | TS= (frailty*) OR TS= (frail*) OR TS= (physical frailty)                                                                                                                                                                                                                                                                                                                                                                                                                                                                                                                                      | 39,158    |
| #2 | TS= (psychological frailty)                                                                                                                                                                                                                                                                                                                                                                                                                                                                                                                                                                   | 810       |
| #3 | #1 AND #2                                                                                                                                                                                                                                                                                                                                                                                                                                                                                                                                                                                     | 810       |
| #4 | TS= (elder* OR geriatric* OR "old age" OR "oldest old" OR "older old" OR "later life" OR ageing OR aging OR "old adults" OR "older adults" OR "oldest adults" OR "old population" OR "Older population" OR "oldest population" OR "old individuals" OR "older individuals" OR "oldest individuals" OR "old patients" OR "older patients" OR "oldest patients" OR "old persons" OR "older persons" OR "oldest persons" OR "old people" OR "older people" OR "oldest people" OR "aged adults" OR "aged population" OR "aged individuals" OR "aged patients" OR "aged persons" OR "aged people") | 3,894,104 |
| #5 | #3 AND #4                                                                                                                                                                                                                                                                                                                                                                                                                                                                                                                                                                                     | 724       |
| #6 | Limit to "English" and "published year after 2003"                                                                                                                                                                                                                                                                                                                                                                                                                                                                                                                                            |           |
| #7 | #6 AND #7                                                                                                                                                                                                                                                                                                                                                                                                                                                                                                                                                                                     | 681       |

PsycINFO (via ProQuest) Search:

|    |                                                                                                                                                                                                                                                                                                                                                                                                                                                                                                                                                                                                  |         |
|----|--------------------------------------------------------------------------------------------------------------------------------------------------------------------------------------------------------------------------------------------------------------------------------------------------------------------------------------------------------------------------------------------------------------------------------------------------------------------------------------------------------------------------------------------------------------------------------------------------|---------|
| #1 | Frailty* [Anywhere] OR Frail* [Anywhere] OR Physical frailty [Anywhere]                                                                                                                                                                                                                                                                                                                                                                                                                                                                                                                          | 6,495   |
| #2 | Psychological frailty [Anywhere]                                                                                                                                                                                                                                                                                                                                                                                                                                                                                                                                                                 | 663     |
| #3 | #1 AND #2                                                                                                                                                                                                                                                                                                                                                                                                                                                                                                                                                                                        | 663     |
| #4 | (elder* OR geriatric* OR "old age" OR "oldest old" OR "older old" OR "later life" OR ageing OR aging OR "old adults" OR "older adults" OR "oldest adults" OR "old population" OR "Older population" OR "oldest population" OR "old individuals" OR "older individuals" OR "oldest individuals" OR "old patients" OR "older patients" OR "oldest patients" OR "old persons" OR "older persons" OR "oldest persons" OR "old people" OR "older people" OR "oldest people" OR "aged adults" OR "aged population" OR "aged individuals" OR "aged patients" OR "aged persons" OR "aged people") [TIAB] | 183,376 |
| #5 | #3 AND #4                                                                                                                                                                                                                                                                                                                                                                                                                                                                                                                                                                                        | 456     |
| #6 | Limit to "English" and "published year after 2003"                                                                                                                                                                                                                                                                                                                                                                                                                                                                                                                                               |         |
| #7 | # 5 AND #6                                                                                                                                                                                                                                                                                                                                                                                                                                                                                                                                                                                       | 397     |

**Supplement Table 1.**

**Supplement Table 1.** Characteristics of included studies

| Authors<br>(year)         | Countries or<br>regions | Research design<br>(sample size)   | Setting                     | Components of psychological frailty                                                                                                                   | Definition of psychological<br>frailty                                                | Measurements                             |                         |
|---------------------------|-------------------------|------------------------------------|-----------------------------|-------------------------------------------------------------------------------------------------------------------------------------------------------|---------------------------------------------------------------------------------------|------------------------------------------|-------------------------|
|                           |                         |                                    |                             |                                                                                                                                                       |                                                                                       | Instruments                              | Number of<br>components |
| Puts et al.<br>(2005)     | Netherlands             | Longitudinal<br>(n=1,152)          | Community                   | Sense of mastery and depression                                                                                                                       | n/a                                                                                   | CES-D<br>SOMS-7                          | 2                       |
| Rockwood et al.<br>(2005) | Canada                  | Prospective<br>cohort<br>(n=2,305) | Community or<br>institution | Mood problems, depression, restlessness,<br>memory, cognitive symptoms, paranoid features,<br>clouding or delirium, and general mental<br>functioning | n/a                                                                                   | CSHA-FI                                  | 8                       |
| Rolfson et al.<br>(2006)  | Canada                  | Cross-sectional<br>(n=158)         | Inpatient and<br>outpatient | Mood                                                                                                                                                  | n/a                                                                                   | EFS                                      | 1                       |
| Gu et al.<br>(2009)       | China                   | Longitudinal<br>(n=15,919)         | Any settings                | Symptom of psychological distress<br>(loneliness, usefulness, and fearfulness)                                                                        | n/a                                                                                   | FI-39                                    | 3                       |
| Gobbens et al.<br>(2010a) | n/a                     | Theoretical<br>(n/a)               | n/a                         | Cognition, emotion, and coping                                                                                                                        | Psychological variables<br>related to frailty<br>(Psychological domain of<br>frailty) | n/a                                      | n/a                     |
| Gobbens et al.<br>(2010b) | Netherlands             | Cross-sectional<br>(n=245;234)     | Community                   | Coping, anxiety, depressive symptoms, and<br>cognition                                                                                                | Definition of Gobbens et<br>al. (2010a)                                               | TFI<br>MMSE<br>GES-D<br>HANS-A<br>SOMS-5 | 4                       |
| Gobbens et al.<br>(2010c) | Netherlands             | Cross-sectional<br>(n=484)         | Community                   | Coping, anxiety, depressive symptoms, and<br>cognition                                                                                                | Definition of Gobbens et<br>al. (2010a)                                               | TFI                                      | 4                       |

|                                |                |                              |                    |                                                                                                                      |                                                                                  |                                                           |   |
|--------------------------------|----------------|------------------------------|--------------------|----------------------------------------------------------------------------------------------------------------------|----------------------------------------------------------------------------------|-----------------------------------------------------------|---|
| Kamaruzzaman et al. (2010)     | United Kingdom | Cohort (n=4,286)             | Community          | Psychological problems (Memory, anxiety, and depression)                                                             | n/a                                                                              | BFI                                                       | 3 |
| Ernst Bravell et al. (2011)    | Sweden         | Cross-sectional (n=315)      | Community          | Anxiety/insecurity, sadness/gloom, cognitive deficiency, and behaviors that are hard to handle/manage                | n/a                                                                              | A scale of psychological/cognitive symptoms in SNAC study | 4 |
| Gobbens et al. (2012a)         | Netherlands    | Cross-sectional (n=213)      | Community          | Coping, anxiety, depressive symptoms, and cognition                                                                  | Definition of Gobbens et al. (2010a)                                             | TFI                                                       | 4 |
| Gobbens et al. (2012b)         | Netherlands    | Longitudinal (n=484;336;266) | Community          | Coping, anxiety, depressive symptoms, and cognition                                                                  | Definition of Gobbens et al. (2010a)                                             | TFI                                                       | 4 |
| Gobbens et al. (2012c)         | Netherlands    | Longitudinal (n=245;179;141) | Community          | Coping, anxiety, depressive symptoms, and cognition                                                                  | Definition of Gobbens et al. (2010a)                                             | TFI                                                       | 4 |
| Bielderman et al. (2013)       | Netherlands    | Cross-sectional (n=1,508)    | Community          | Psychosocial functioning (Sadness and anxiousness)                                                                   | n/a                                                                              | GFI                                                       | 2 |
| Brehmer-Rinderer et al. (2013) | Austria        | Cross-sectional (n=147)      | Clinical setting   | Fear of falling, memory, exhaustion, anxiety, sadness, anger and other psychological changes                         | n/a                                                                              | VFQ-ID-R                                                  | 7 |
| De Witte et al. (2013)         | Belgium        | Cross-sectional (n=33,629)   | Community          | Mood disorders and loneliness                                                                                        | A combination of mood disorders and loneliness                                   | CFAI                                                      | 2 |
| Garre-Olmo et al. (2013)       | Spain          | Prospective cohort (n=875)   | Community          | Suspected cognitive impairment, suspected depression, low cognitive self-concept, and low quality of life perception | Mental frailty phenotype (MFP) operationally defined as two or more MFP criteria | MMSE<br>GDS-5<br>SAPS<br>VAS                              | 4 |
| Schoufour et al. (2013)        | Netherlands    | Cross-sectional (n=1,050)    | Care organizations | Fatigue, listlessness, and panic attacks                                                                             | n/a                                                                              | Dutch version of ADESS                                    | 3 |

|                         |             |                          |                                         |                                                                                                                                                                                                       |                                                                                                                                                                                                                                                        |                       |    |
|-------------------------|-------------|--------------------------|-----------------------------------------|-------------------------------------------------------------------------------------------------------------------------------------------------------------------------------------------------------|--------------------------------------------------------------------------------------------------------------------------------------------------------------------------------------------------------------------------------------------------------|-----------------------|----|
| Ament et al. (2014)     | Netherlands | Longitudinal (n=475)     | Community                               | Downheartedness and anxiety                                                                                                                                                                           | n/a                                                                                                                                                                                                                                                    | GFI                   | 2  |
| Andreasen et al. (2014) | Denmark     | Cross-sectional (n=34)   | Community center and acute medical ward | Coping, anxiety, depressive symptoms, and cognition                                                                                                                                                   | Definition of Gobbens et al. (2010a)                                                                                                                                                                                                                   | Danish version of TFI | 4  |
| Gobbens et al. (2014)   | Netherlands | Longitudinal (n=261;196) | Community                               | Coping, anxiety, depressive symptoms, and cognition                                                                                                                                                   | Definition of Gobbens et al. (2010a)                                                                                                                                                                                                                   | TFI                   | 4  |
| Coelho et al. (2015)    | Portugal    | Cross-sectional (n=252)  | Community                               | Coping, anxiety, depressive symptoms, and cognition                                                                                                                                                   | Definition of Gobbens et al. (2010a)                                                                                                                                                                                                                   | TFI                   | 4  |
| Fitten (2015)           | n/a         | Theoretical (n/a)        | n/a                                     | Cognitive, mood, and motivational components                                                                                                                                                          | Brain alterations that are beyond natural aging, but are not necessarily diseases, and contribute to decreased mood or cognitive resilience when confronted with minor stressors, and might induce adverse health outcomes similar to physical frailty | n/a                   | 3  |
| Gobbens et al. (2015)   | Netherlands | Cross-sectional (n=221)  | Assisted living facilities              | Coping, anxiety, depressive symptoms, and cognition                                                                                                                                                   | Definition of Gobbens et al. (2010a)                                                                                                                                                                                                                   | TFI                   | 4  |
| Kwan et al. (2015)      | Hong Kong   | Cross-sectional (n=124)  | Community                               | FI-32: Psychocognitive well-being (psychiatric disorders, dementia and hopelessness); FI-32 Plus: (A) positive psychological well-being (4 items) and (B) negative psychological well-being (3 items) | n/a                                                                                                                                                                                                                                                    | FI-32<br>FI-32 Plus   | 10 |
| Peters et al. (2015)    | Netherlands | Cohort (n=5,712)         | Community                               | Psychosocial functioning                                                                                                                                                                              | n/a                                                                                                                                                                                                                                                    | GFI                   | 5  |

|                           |             |                           |           |                                                                             |                                                                                             |                        |     |
|---------------------------|-------------|---------------------------|-----------|-----------------------------------------------------------------------------|---------------------------------------------------------------------------------------------|------------------------|-----|
| Roppolo et al. (2015)     | Italy       | Cross-sectional (n=267)   | Community | Coping, anxiety, depressive symptoms, and cognition                         | Definition of Gobbens et al. (2010a)                                                        | Italian version of TFI | 4   |
| Freitag et al. (2016)     | Germany     | Cross-sectional (n=210)   | Community | Coping, anxiety, depressive symptoms, and cognition                         | Definition of Gobbens et al. (2010a)                                                        | German version of TFI  | 4   |
| Gobbens et al. (2016)     | Netherlands | Cross-sectional (n=610)   | Community | Coping, anxiety, depressive symptoms, and cognition                         | Definition of Gobbens et al. (2010a)                                                        | TFI                    | 4   |
| Uchmanowicz et al. (2016) | Poland      | Cross-sectional (n=212)   | Community | Coping, anxiety, depressive symptoms, and cognition                         | Definition of Gobbens et al. (2010a)                                                        | Polish version of TFI  | 4   |
| Coelho et al. (2017)      | Portugal    | Cross-sectional (n=252)   | Community | Coping, anxiety, depressive symptoms, and cognition                         | Definition of Gobbens et al. (2010a)                                                        | TFI                    | 4   |
| Dong et al. (2017)        | China       | Cross-sectional (n=917)   | Community | Coping, anxiety, depressive symptoms, and cognition                         | Definition of Gobbens et al. (2010a)                                                        | Chinese version of TFI | 4   |
| Gobbens et al. (2017)     | Netherlands | Cross-sectional (n=671)   | Community | Coping, anxiety, depressive symptoms, and cognition                         | Definition of Gobbens et al. (2010a)                                                        | TFI                    | 4   |
| Patel et al. (2017)       | n/a         | Theoretical (n/a)         | n/a       | Bereavement, low mood, lack of motivation, and labile emotions              | Psychological frailty denotes the inherent traits that may predispose a person to adversity | n/a                    | n/a |
| van Oostrom et al. (2017) | Netherlands | Cross-sectional (n=4,019) | Community | Depression and poor mental health                                           | Adapted from Gobbens et al. (2010a)                                                         | CES-D<br>MHI-5         | 2   |
| Hogan (2018)              | n/a         | Theoretical (n/a)         | n/a       | Cognition, depression, and psychological attributes (e.g., positive affect) | n/a                                                                                         | n/a                    | n/a |

|                          |                                        |                            |                                    |                                                            |                                                                                                      |                         |   |
|--------------------------|----------------------------------------|----------------------------|------------------------------------|------------------------------------------------------------|------------------------------------------------------------------------------------------------------|-------------------------|---|
| Ma et al. (2018)         | China                                  | Cross-sectional (n=5,844)  | Community                          | Poor mental health                                         | n/a                                                                                                  | CGA-FI<br>CES-D         | 1 |
| Rietman et al. (2018)    | Netherlands                            | Cross-sectional (n=4,019)  | Community                          | Depression and mental health problems                      | Psychological frailty defined as meeting both criteria for poor general mental health and depression | CES-D<br>MHI-5          | 2 |
| Vrotsou et al. (2018)    | Spain                                  | Prospective cohort (n=865) | Community                          | Coping, anxiety, depression, and cognition                 | Definition of Gobbens et al. (2010a)                                                                 | Spanish version of TFI  | 4 |
| Hoeyberghs et al. (2019) | Belgium                                | Cross-sectional (n=16,872) | Community                          | Mood disorders and loneliness                              | Definition of De Witte et al. (2013)                                                                 | CFAI                    | 2 |
| Salem et al. (2019)      | Los Angeles and Pomona (United States) | Cross-sectional (n=130)    | Formerly incarcerated and homeless | Coping, anxiety, depression, and cognition                 | Definition of Gobbens et al. (2010a)                                                                 | TFI                     | 4 |
| Shimada et al. (2019)    | Japan                                  | National cohort (n= 4,126) | Any settings                       | Physical frailty and depression                            | The coexistence of depression and physical frailty                                                   | FFP<br>GDS-15           | 2 |
| Teo et al. (2019)        | Singapore                              | Cross-sectional (n=2,387)  | Community                          | Poor self-rated health, low mood, and cognitive impairment | Mental Frailty (MF) defined as meeting one or more of the MF criteria                                | MMSE<br>GDS-15<br>SF-12 | 3 |
| Verver et al. (2019)     | Netherlands                            | Cross-sectional (n=1,768)  | Community                          | Coping, anxiety, depression, and cognition                 | Definition of Gobbens et al. (2010a)                                                                 | TFI                     | 4 |



|                         |                                                         |                                    |                                  |                                                                                  |                                      |                               |    |
|-------------------------|---------------------------------------------------------|------------------------------------|----------------------------------|----------------------------------------------------------------------------------|--------------------------------------|-------------------------------|----|
| Zhang et al. (2019)     | United Kingdom, Greece, Croatia, Netherlands, and Spain | Cross-sectional (n=2,167)          | Community                        | Coping, anxiety, depression, and cognition                                       | Definition of Gobbens et al. (2010a) | TFI                           | 4  |
| Alqahtani et al. (2020) | Saudi Arabia                                            | Cross-sectional (n=84)             | Community                        | Coping, anxiety, depression, and cognition                                       | Definition of Gobbens et al. (2010a) | Arabic (Saudi) version of TFI | 4  |
| Garner et al. (2020)    | United Kingdom                                          | Longitudinal (n=351)               | Community and retirement village | 17 psychological markers (depressed mood, dementia, psychiatric disorders, etc.) | n/a                                  | COM-FI                        | 17 |
| Gobbens et al. (2020)   | Netherlands                                             | Prospective cohort (n=1,328)       | Community                        | Cognition, depression, anxiety, and coping                                       | Definition of Gobbens et al. (2010a) | TFI                           | 4  |
| Nishida et al. (2020)   | Japan                                                   | Cross-sectional (n=3,475)          | Community                        | Depression                                                                       | n/a                                  | FC                            | 1  |
| Ožić et al. (2020)      | Rijeka (Croatia)                                        | Prospective interventional (n=410) | Community                        | Cognition, anxiety, depression, and coping                                       | Definition of Gobbens et al. (2010a) | TFI                           | 4  |
| Zhang et al. (2020)     | China                                                   | Cross-sectional (n=5,341)          | Community                        | Six items on mental state (poor concentration, sadness or depression, etc.)      | n/a                                  | FI-33                         | 6  |
| Gobbens et al. (2021a)  | Netherlands                                             | Longitudinal (n=479)               | Community                        | Cognition, anxiety, depression, and coping                                       | Definition of Gobbens et al. (2010a) | TFI                           | 4  |
| Gobbens et al. (2021b)  | Netherlands                                             | Longitudinal (n=479)               | Community                        | Cognition, anxiety, depression, and coping                                       | Definition of Gobbens et al. (2010a) | TFI                           | 4  |
| Shin et al. (2021)      | Korea                                                   | Cross-sectional (n=2,923)          | Community                        | Fatigue and loss of energy                                                       | n/a                                  | KFS                           | 2  |

|                            |                                                         |                            |           |                                                                        |                                      |                               |   |
|----------------------------|---------------------------------------------------------|----------------------------|-----------|------------------------------------------------------------------------|--------------------------------------|-------------------------------|---|
| Van der Elst et al. (2021) | Belgium                                                 | Cross-sectional (n=12,659) | Community | Mood disorders and loneliness                                          | Definition of De Witte et al. (2013) | CFAI                          | 2 |
| Venturini et al. (2021)    | Brazil                                                  | Cross-sectional (n=3,569)  | Community | Memory problems, depressive symptoms, sadness, and concern about falls | Adapted from Gobbens et al. (2010a)  | GDS-15 Brazil<br>FES-I Brazil | 4 |
| Ye et al. (2021)           | United Kingdom, Greece, Croatia, Netherlands, and Spain | Cross-sectional (n=2,325)  | Community | Cognition, anxiety, depression, and coping                             | Definition of Gobbens et al. (2010a) | TFI                           | 4 |
| Sugie et al. (2022)        | Japan                                                   | Cross-sectional (n=577)    | Village   | Depression                                                             | n/a                                  | GDS-15                        | 1 |
| van Assen et al. (2022)    | Netherlands                                             | Cross-sectional (n=45,336) | Community | Cognition, anxiety, depression, and coping                             | Definition of Gobbens et al. (2010a) | TFI                           | 4 |

Notes: n/a = Not Applicable or Not Available; ADESS = Anxiety, Depression And Mood Scale; BFI = British Frailty Index; GDS-5 = 5-item Geriatric Depression Scale; GDS-15 = 15-item Geriatric Depression Scale; CES-D = Center for Epidemiologic Studies Depression Scale 20 items version; CFAI = Comprehensive Frailty Assessment Instrument; CGA-FI = Comprehensive Geriatric Assessment-Frailty Index; COM-FI = Community-Oriented Frailty Index; CSHA = Canadian Study of Health and Aging; EFS = Edmonton Frail Scale; FC = Frailty Checklist (Yamada et al., 2012); FES-I Brazil = Brazilian version of the Falls Efficacy Scale–International; FFP = Fried's Frailty Phenotype; FI = Frailty Index; GFI = Groningen Frailty Indicator; HADS-A = Hospital Anxiety and Depression Scale-anxiety subscale; HRQOL = Health-related Quality of Life; KFS = Korean Frailty Scale; MHI-5 = Mental Health Inventory 5 items version; MMSE = Mini-Mental State Examination; QOL = Quality of Life; SAPS = Subjective Aging Perception Scale; SF-12 = 12-item Short Form Survey; SNAC = Swedish National Study on Aging and Care; SOMS-5 = 5-item version of the Sense of Mastery Scale; SOMS-7 = 7-item version of the Sense of Mastery Scale; TFI = Tilburg Frailty Indicator; VAS = Visual Analogue Scale; VFQ-ID-R = Vienna Frailty Questionnaire-Intellectual Disabilities – Revised

## References:

- Alqahtani, B. A., Abdelbasset, W. K., & Alenazi, A. M. (2020). Psychometric analysis of the Arabic (Saudi) Tilburg Frailty Indicator among Saudi community-dwelling older adults. *Arch Gerontol Geriatr*, *90*, 104128. doi:10.1016/j.archger.2020.104128
- Ament, B., Vugt, M., Verhey, F., & Kempen, G. (2014). Are physically frail older persons more at risk of adverse outcomes if they also suffer from cognitive, social, and psychological frailty? *European Journal of Ageing*, *11*(3), 213-219. doi:10.1007/s10433-014-0308-x
- Andreasen, J., Sørensen, E. E., Gobbens, R. J., Lund, H., & Aadahl, M. (2014). Danish version of the Tilburg Frailty Indicator—translation, cross-cultural adaption and validity pretest by cognitive interviewing. *Arch Gerontol Geriatr*, *59*(1), 32-38. doi:10.1016/j.archger.2014.02.007
- Bielderman, A., Van Der Schans, C. P., Van Lieshout, M. R. J., De Greef, M. H. G., Boersma, F., Krijnen, W. P., & Steverink, N. (2013). Multidimensional structure of the Groningen Frailty Indicator in community-dwelling older people. *BMC Geriatrics*, *13*(1). doi:10.1186/1471-2318-13-86
- Brehmer-Rinderer, B., Zeilinger, E. L., Radaljevic, A., & Weber, G. (2013). The Vienna Frailty Questionnaire for Persons with Intellectual Disabilities—Revised. *Research in Developmental Disabilities*, *34*(6), 1958-1965. doi:<http://dx.doi.org/10.1016/j.ridd.2013.03.004>
- Coelho, T., Paúl, C., Gobbens, R. J. J., & Fernandes, L. (2015). Determinants of frailty: the added value of assessing medication. *Frontiers in Aging Neuroscience*, *7*, 1-8. doi:10.3389/fnagi.2015.00056
- Coelho, T., Paúl, C., Gobbens, R. J. J., & Fernandes, L. (2017). Multidimensional Frailty and Pain in Community Dwelling Elderly. *Pain Med*, *18*(4), 693-701. doi:10.1111/pme.12746
- De Witte, N., Gobbens, R., De Donder, L., Dury, S., Buffel, T., Schols, J., & Verté, D. (2013). The comprehensive frailty assessment instrument: development, validity and reliability. *Geriatr Nurs*, *34*(4), 274-281. doi:10.1016/j.gerinurse.2013.03.002
- Dong, L., Liu, N., Tian, X., Qiao, X., Gobbens, R. J. J., Kane, R. L., & Wang, C. (2017). Reliability and validity of the Tilburg Frailty Indicator (TFI) among Chinese community-dwelling older people. *Arch Gerontol Geriatr*, *73*, 21-28. doi:10.1016/j.archger.2017.07.001
- Ernst Bravell, M., Westerlind, B., Midlöv, P., Östgren, C.-J., Borgquist, L., Lannering, C., & Mölstad, S. (2011). How to assess frailty and the need for care? Report from the Study of Health and Drugs in the Elderly (SHADES) in community dwellings in Sweden. *Archives of Gerontology and Geriatrics*, *53*(1), 40-45. doi:<http://dx.doi.org/10.1016/j.archger.2010.06.011>
- Fitten, L. J. (2015). Psychological Frailty in the Aging Patient. *Nestle Nutr Inst Workshop Ser*, *83*, 45-53. doi:10.1159/000382060
- Freitag, S., Schmidt, S., & Gobbens, R. J. (2016). Tilburg frailty indicator. German translation and psychometric testing. *Z Gerontol Geriatr*, *49*(2), 86-93. doi:10.1007/s00391-015-0889-9
- Garner, I. W., Burgess, A. P., & Holland, C. A. (2020). Developing and validating the Community-Oriented Frailty Index (COM-FI). *Arch Gerontol Geriatr*, *91*, 104232. doi:10.1016/j.archger.2020.104232
- Garre-Olmo, J., Calvó-Pexas, L., López-Pousa, S., de Gracia Blanco, M., & Vilalta-Franch, J. (2013). Prevalence of frailty phenotypes and risk of mortality in a community-dwelling elderly cohort. *Age and Ageing*, *42*(1), 46-51. doi:10.1093/ageing/afs047
- Gobbens, R. J. J., & Andreasen, J. (2020). The prediction of readmission and mortality by the domains and components of the Tilburg Frailty Indicator (TFI): A prospective cohort study among acutely admitted

- older patients. *Archives of Gerontology & Geriatrics*, 89, N.PAG-N.PAG. doi:10.1016/j.archger.2020.104077
- Gobbens, R. J. J., Krans, A., & van Assen, M. A. L. M. (2015). Validation of an integral conceptual model of frailty in older residents of assisted living facilities. *Archives of Gerontology & Geriatrics*, 61(3), 400-410. doi:10.1016/j.archger.2015.06.001
- Gobbens, R. J. J., Luijckx, K. G., Wijnen-Sponselee, M. T., & Schols, J. M. (2010a). Towards an integral conceptual model of frailty. *Journal of Nutrition, Health & Aging*, 14(3), 175-181. doi:10.1007/s12603-010-0045-6
- Gobbens, R. J. J., Schols, J. M., & van Assen, M. A. (2017). Exploring the efficiency of the Tilburg Frailty Indicator: a review. *Clin Interv Aging*, 12, 1739-1752. doi:10.2147/cia.S130686
- Gobbens, R. J. J., & van Assen, M. A. (2012c). Frailty and its prediction of disability and health care utilization: the added value of interviews and physical measures following a self-report questionnaire. *Arch Gerontol Geriatr*, 55(2), 369-379. doi:10.1016/j.archger.2012.04.008
- Gobbens, R. J. J., van Assen, M. A., Luijckx, K. G., & Schols, J. M. (2012a). Testing an integral conceptual model of frailty. *Journal of Advanced Nursing (John Wiley & Sons, Inc.)*, 68(9), 2047-2060. doi:10.1111/j.1365-2648.2011.05896.x
- Gobbens, R. J. J., van Assen, M. A. L., Luijckx, K. G., Wijnen-Sponselee, M. T., & Schols, J. M. (2010b). The Tilburg Frailty Indicator: psychometric properties. *Journal of the American Medical Directors Association*, 11(5), 344-355. doi:10.1016/j.jamda.2009.11.003
- Gobbens, R. J. J., van Assen, M. A. L., Luijckx, K. G., Wijnen-Sponselee, M. T., & Schols, J. M. (2010c). Determinants of frailty. *Journal of the American Medical Directors Association*, 11(5), 356-364. doi:10.1016/j.jamda.2009.11.008
- Gobbens, R. J. J., & van Assen, M. A. L. M. (2014). The prediction of quality of life by physical, psychological and social components of frailty in community-dwelling older people. *Quality of Life Research*, 23(8), 2289-2300. doi:10.1007/s11136-014-0672-1
- Gobbens, R. J. J., & van Assen, M. A. L. M. (2016). Explaining frailty by lifestyle. *Archives of Gerontology & Geriatrics*, 66, 49-53. doi:10.1016/j.archger.2016.04.011
- Gobbens, R. J. J., van Assen, M. A. L. M., Augustijn, H., Goumans, M., & van der Ploeg, T. (2021a). Prediction of Mortality by the Tilburg Frailty Indicator (TFI). *Journal of the American Medical Directors Association*, 22(3), 607.e601-607.e606. doi:10.1016/j.jamda.2020.07.033
- Gobbens, R. J. J., van Assen, M. A. L. M., Luijckx, K. G., & Schols, J. M. (2012b). The Predictive Validity of the Tilburg Frailty Indicator: Disability, Health Care Utilization, and Quality of Life in a Population at Risk. *Gerontologist*, 52(5), 619-631. doi:10.1093/geront/gnr135
- Gobbens, R. J. J., & van der Ploeg, T. (2021b). The Development of Multidimensional Frailty Over Seven Years A longitudinal study among Dutch community-dwelling older people using the Tilburg Frailty Indicator. *Archives of Gerontology & Geriatrics*, 95, N.PAG-N.PAG. doi:10.1016/j.archger.2021.104393
- Gu, D., Dupre, M. E., Sautter, J., Zhu, H., Liu, Y., & Yi, Z. (2009). Frailty and mortality among Chinese at advanced ages. *The Journals of Gerontology: Series B: Psychological Sciences and Social Sciences*, 64B(2), 279-289. doi:<http://dx.doi.org/10.1093/geronb/gbn009>
- Hoeyberghs, L. J., Verté, E., Verté, D., Schols, J. M. G. A., & De Witte, N. (2019). The importance of sources of meaning in life of community dwelling psychologically frail older people. *Working with Older People: Community Care Policy & Practice*, 23(2), 65-76. doi:10.1108/WWOP-01-2019-0001
- Hogan, D. B. (2018). Models, definitions, and criteria for frailty. In *Conn's Handbook of Models for Human Aging*

(pp. 35-44): Elsevier.

- Kamaruzzaman, S., Ploubidis, G. B., Fletcher, A., & Ebrahim, S. (2010). A reliable measure of frailty for a community dwelling older population. *Health Qual Life Outcomes*, *8*, 123. doi:10.1186/1477-7525-8-123
- Kwan, J. S., Lau, B. H., & Cheung, K. S. (2015). Toward a Comprehensive Model of Frailty: An Emerging Concept From the Hong Kong Centenarian Study. *J Am Med Dir Assoc*, *16*(6), 536.e531-537. doi:10.1016/j.jamda.2015.03.005
- Ma, L., Tang, Z., Zhang, L., Sun, F., Li, Y., & Chan, P. (2018). Prevalence of Frailty and Associated Factors in the Community-Dwelling Population of China. *J Am Geriatr Soc*, *66*(3), 559-564. doi:10.1111/jgs.15214
- Nishida, T., Yamabe, K., & Honda, S. (2020). Dysphagia is associated with oral, physical, cognitive and psychological frailty in Japanese community-dwelling elderly persons. *Gerodontology*, *37*(2), 185-190. doi:10.1111/ger.12455
- Ožić, S., Vasiljev, V., Ivković, V., Bilajac, L., & Rukavina, T. (2020). Interventions aimed at loneliness and fall prevention reduce frailty in elderly urban population. *Medicine*, *99*(8), 1-8. doi:10.1097/MD.00000000000019145
- Patel, H., Clift, E., Lewis, L., & Cooper, C. (2017). Epidemiology of Sarcopenia and Frailty. In Y. Dionyssiotis (Ed.), *Frailty and Sarcopenia - Onset, Development and Clinical Challenges* (pp. 7): IntechOpen.
- Peters, L. L., Boter, H., Burgerhof, J. G., Slaets, J. P., & Buskens, E. (2015). Construct validity of the Groningen Frailty Indicator established in a large sample of home-dwelling elderly persons: Evidence of stability across age and gender. *Exp Gerontol*, *69*, 129-141. doi:10.1016/j.exger.2015.05.006
- Puts, M. T. E., Lips, P., & Deeg, D. J. H. (2005). Static and dynamic measures of frailty predicted decline in performance-based and self-reported physical functioning. *Journal of Clinical Epidemiology*, *58*(11), 1188-1198. doi:<https://doi.org/10.1016/j.jclinepi.2005.03.008>
- Rietman, M. L., Van Der A, D. L., Van Oostrom, S. H., Picavet, H. S. J., Dollé, M. E. T., Van Steeg, H., . . . Spijkerman, A. M. W. (2018). The Association Between BMI and Different Frailty Domains: A U-Shaped Curve? *Journal of Nutrition, Health & Aging*, *22*(1), 8-15. doi:10.1007/s12603-016-0854-3
- Rockwood, K., Song, X., MacKnight, C., Bergman, H., Hogan, D. B., McDowell, I., & Mitnitski, A. (2005). A global clinical measure of fitness and frailty in elderly people. *Canadian Medical Association Journal*, *173*(5), 489. doi:10.1503/cmaj.050051
- Rolfson, D. B., Majumdar, S. R., Tsuyuki, R. T., Tahir, A., & Rockwood, K. (2006). Validity and reliability of the Edmonton Frail Scale. *Age and Ageing*, *35*(5), 526-529. doi:10.1093/ageing/afl041
- Roppolo, M., Mulasso, A., Gobbens, R. J., Mosso, C. O., & Rabaglietti, E. (2015). A comparison between uni- and multidimensional frailty measures: prevalence, functional status, and relationships with disability. *Clin Interv Aging*, *10*, 1669-1678. doi:10.2147/cia.S92328
- Salem, B. E., Brecht, M.-L., Ekstrand, M. L., Faucette, M., & Nyamathi, A. M. (2019). Correlates of physical, psychological, and social frailty among formerly incarcerated, homeless women. *Health Care for Women International*, *40*(7-9), 788-812. doi:10.1080/07399332.2019.1566333
- Schoufour, J. D., Mitnitski, A., Rockwood, K., Evenhuis, H. M., & Ehteld, M. A. (2013). Development of a frailty index for older people with intellectual disabilities: results from the HA-ID study. *Res Dev Disabil*, *34*(5), 1541-1555. doi:10.1016/j.ridd.2013.01.029
- Shimada, H., Lee, S., Doi, T., Bae, S., Tsutsumimoto, K., & Arai, H. (2019). Prevalence of Psychological Frailty in Japan: NCGG-SGS as a Japanese National Cohort Study. *J Clin Med*, *8*(10). doi:10.3390/jcm8101554

- Shin, J., Kim, M., & Choi, J. (2021). Development and Validation of a Multidimensional Frailty Scale for Clinical Geriatric Assessment. *Journal of Nutrition, Health & Aging, 25*(7), 938-943. doi:10.1007/s12603-021-1652-0
- Sugie, M., Harada, K., Nara, M., Kugimiya, Y., Takahashi, T., Kitagou, M., . . . Ito, H. (2022). Prevalence, overlap, and interrelationships of physical, cognitive, psychological, and social frailty among community-dwelling older people in Japan. *Arch Gerontol Geriatr, 100*, 104659. doi:10.1016/j.archger.2022.104659
- Teo, N., Yeo, P. S., Gao, Q., Nyunt, M. S. Z., Foo, J. J., Wee, S. L., & Ng, T. P. (2019). A bio-psycho-social approach for frailty amongst Singaporean Chinese community-dwelling older adults - evidence from the Singapore Longitudinal Aging Study. *BMC Geriatr, 19*(1), 350. doi:10.1186/s12877-019-1367-9
- Uchmanowicz, I., Jankowska-Polańska, B., Uchmanowicz, B., Kowalczyk, K., & Gobbens, R. J. (2016). Validity and Reliability of the Polish Version of the Tilburg Frailty Indicator (TFI). *J Frailty Aging, 5*(1), 27-32. doi:10.14283/jfa.2015.66
- van Assen, M. A. L. M., Helmink, J. H. M., & Gobbens, R. J. J. (2022). Associations between lifestyle factors and multidimensional frailty: a cross-sectional study among community-dwelling older people. *BMC Geriatrics, 22*(1), 1-13. doi:10.1186/s12877-021-02704-x
- Van der Elst, M. C. J., Schoenmakers, B., Verté, D., De Donder, L., De Witte, N., Dury, S., . . . De Lepeleire, J. (2021). The relation between age of retirement and frailty in later life? A cross-sectional study in Flemish older adults. *Archives of Gerontology & Geriatrics, 96*, N.PAG-N.PAG. doi:10.1016/j.archger.2021.104473
- van Oostrom, S. H., van der, A. D., Rietman, M. L., Picavet, H. S. J., Lette, M., Verschuren, W. M. M., . . . Spijkerman, A. M. W. (2017). A four-domain approach of frailty explored in the Doetinchem Cohort Study. *BMC Geriatr, 17*(1), 196. doi:10.1186/s12877-017-0595-0
- Venturini, C., Sampaio, R. F., de Souza Moreira, B., Ferrioli, E., Neri, A. L., Lourenço, R. A., & Lustosa, L. P. (2021). A multidimensional approach to frailty compared with physical phenotype in older Brazilian adults: data from the FIBRA-BR study. *BMC Geriatr, 21*(1), 246. doi:10.1186/s12877-021-02193-y
- Verver, D., Merten, H., de Blok, C., & Wagner, C. (2019). A cross sectional study on the different domains of frailty for independent living older adults. *BMC Geriatrics, 19*(1), 1-12. doi:10.1186/s12877-019-1077-3
- Vrotsou, K., Machón, M., Rivas-Ruíz, F., Carrasco, E., Contreras-Fernández, E., Mateo-Abad, M., . . . Vergara, I. (2018). Psychometric properties of the Tilburg Frailty Indicator in older Spanish people. *Arch Gerontol Geriatr, 78*, 203-212. doi:10.1016/j.archger.2018.05.024
- Ye, L., Elstgeest, L. E. M., Zhang, X., Alhambra-Borrás, T., Tan, S. S., & Raat, H. (2021). Factors associated with physical, psychological and social frailty among community-dwelling older persons in Europe: a cross-sectional study of Urban Health Centres Europe (UHCE). *BMC Geriatrics, 21*(1), 1-11. doi:10.1186/s12877-021-02364-x
- Zhang, X., Tan, S. S., Franse, C. B., Alhambra-Borrás, T., Durá-Ferrandis, E., Bilajac, L., . . . Raat, H. (2019). Association between physical, psychological and social frailty and health-related quality of life among older people. *European Journal of Public Health, 29*(5), 936-942. doi:10.1093/eurpub/ckz099
- Zhang, Y., Xu, X. J., Lian, T. Y., Huang, L. F., Zeng, J. M., Liang, D. M., . . . Ni, J. D. (2020). Development of frailty subtypes and their associated risk factors among the community-dwelling elderly population. *Aging (Albany NY), 12*(2), 1128-1140. doi:10.18632/aging.102671
